# Supplementary material for: Nuevas tendencias en Asia Oriental
Source: Springer Nature journal article supplement (doi:10.1007/s11571-019-09534-z), 2007-01-01
Supplement: MOESM1 [file 16710260]

| **Num** | **Fist Author/Year** | **Number of patient** | **Number of seizure** | **Interictal**  **(hour)** | **Sensitivity (%)** | **SOP (min)** | **SPH (sec)** | **FP/h** | **Type of EEG** | **Method** | **Training mood** | **Testing mood** | **Window length/overlap** |
| --- | --- | --- | --- | --- | --- | --- | --- | --- | --- | --- | --- | --- | --- |
| 1. 1 | (Mormann 2000) | 17 |  |  | 65 | 30 | 600 | 0.33 | iEEG | Lag Synchronization Index | 40 artifact-free segments | All of the data except 40 artifact-free segments | 23.6 s / 20% |
| 1. 2 | (V. Navarro 2002) | 11 | 41 | 12-60 | 83 | 50 | 300 | 0.3 | s+iEEG | Similarity index |  |  | 30 s/- |
|  | (Niederhauser JJ 2003) | 5 | 31 | 335 | 94 |  |  | 0.8 | iEEG | Sign periodogram transf | Patients: JSPECT | Ten patients | 200 points/ non-overlapping |
|  | (W. De Clercq 2003) | 4 | 46 | 160 | 63 |  |  | 0.28 | iEEG | Feature selection |  |  |  |
|  | (S. D. Iasemidis LD 2003) | 5 | 28 |  | 83 |  |  | 0.17 | iEEG | Dynamical entrainment | The first half of the data | The second half of the data | 10.24 s/ non-overlapping |
|  | (Winterhalder M 2003) | 21 | 88 | 509 | 42 | 30 | 5 | 0.15 | iEEG | Similarity index | The first half of the data | The second half of the data | 300 s / 30% |
|  | (Maiwald 2004) | 21 | 88 | 509 | 18 -31% | 30 | 5 | 1–3.6 | iEEG | Accumulated energy |  |  | 1.25 s /step size:0.45 s |
|  | (Maiwald 2004) | 21 | 88 | 509 | 21-42%, | 30 | 5 | 1–3.6 | iEEG | dynamical similarity index |  |  | 1.25 s /step size:0.45 s |
|  | (Maiwald 2004) | 21 | 88 | 509 | 13 - 30% | 30 | 5 | 1–3.6 | iEEG | effective correlation  dimension |  |  | 1.25 s /step size:0.45 s |
|  | (Esteller R 2005) | 4 | 42 | 168 | 71 |  |  | 0.11 | iEEG | Accumulated energy | Data segments of each patient | The rest of the experimental data set | 1 and 20 min/- |
|  | (S. D. Iasemidis LD 2005) | 2 | 11 | 8 | 82 |  |  | 0.15 | iEEG | Dynamical entrainment | The first half of the data | The second half of the data | 10.24 s/ non-overlapping |
|  | (B. Schelter 2006) | 4 | 20 | 96 | 70 | 30 | 10 | 0.15 | iEEG | Phase synchronization |  |  |  |
|  | (Schad 2008) | 6 | 50 | 24~76.8 h/pat | 50 | 30 |  | 0.15 | iEEG | Based on simulated leaky integrate-and-fire neurons |  |  | 20 min/step size:1 s |
|  | (A. Kamali 2008) | 19 |  | >24/pat | 89.68 |  |  |  | iEEG | Empirical Mode Decomposition (EMD) | 80% of data | 20% of data | 12, 24, 35, 47 s/ 50% |
|  | (Mamaghanian H 2008) | 21 | 10 | >24/pat | 42 |  |  | 0.1 | iEEG | Similarity index |  |  | Step size:10 ms |
|  | (Mamaghanian 2010) | 10 | 40 | >24/pat | 60 | 30 | 8 | 1 | iEEG | Mean Phase Coherency | Patients 13,16 &17 | 21 patients except 13,16 &17 | 10 s / 30% |
|  | (Mamaghanian 2010) | 10 | 40 | >24/pat | 61.5 | 30 | 8 | 1 | iEEG | ‌Dynamical Similarity Index | Patients 13,16 &17 | 21 patients except 13,16 &17 | 10 s / 30% |
|  | (Mamaghanian 2010) | 10 | 40 | >24/pat | 58 | 30 | 8 | 1 | iEEG | Maximum Linear Cross Correlation | Patients 13,16 &17 | 21 patients except 13,16 &17 | 10 s / 30% |
|  | (Mamaghanian 2010) | 10 | 40 | >24/pat | 64 | 30 | 8 | 1 | iEEG | Cross Dynamical Similarity Index | Patients 13,16 &17 | 21 patients except 13,16 &17 | 10 s / 30% |
|  | (Mamaghanian 2010) | 10 | 40 | >24/pat | 62.93 | 50 |  |  | iEEG | Correlation Dimension | Patients 13,16 &17 | 21 patients except 13,16 &17 | 10 s / 30% |
|  | (Miri 2011) | 6 |  | >24/pat | 86.6 | 28 | 180 | 0.067 | iEEG | Recurrence Quantification Analysis |  |  | 5 min/ non-overlaping |
|  | (Niknazar 2013) | 21 |  | >24/pat | 67.94 | 51 | 180 | 0.33 | iEEG | Statistical Behavior of Local Extrema | The first hour of the interictal data (For each patient) | The interictal data except the first hour and the pre-ictal data (For each patient) | 5 s / non-overlapping |
|  | (Niknazar 2013) | 9 |  | >24/pat | 73 | 51 | 180 | 0.33 | iEEG | Signal Volume Behavior in the State Space | The first hour of the interictal data (For each patient) | The rest of the data (For each patient) | 5 s / non-overlapping |
|  | (Niknazar 2013) | 5 |  | >24/pat | 63.63 | 51 | 180 | 0.33 | iEEG | Similarity Measure in Recurrence Plots | The first hour of the interictal data (For each patient) | The interictal data except the first hour and the pre-ictal data (For each patient) | 5 s/non-overlapping |
|  | (Bandarabadi 2015) | 8 | 183 | 3565 | 75.8 (66 seizures) |  |  | 0.1 | iEEG+ sEEG | Maximum Difference of ADHs | 72 seizures | 87 seizures | 5 s /non-overlapping |
|  | (Bedeeuzzaman 2014) | 12 | 73 | >24/pat | 100 |  |  | Very low | iEEG | Mean Absolute Deviation (MAD) | Ten-minute interval of each seizure onset | The data of the remaining one seizure | 1 min /non-overlapping |
|  | (Zhang 2016) | 18 | 80 | 427 | 100 |  |  | 0.032 | iEEG/sEEG | Principal Component Analysis (PCA),  K-nearest neighbor (KNN) | two seizures of each patient | One remained seizure of the patient | 4 s/ 50% |

# **Reference**

Mormann, F. Lehnertz, K. and et al. 2000. "Mean phase coherence as a measure for phase synchronization and its application to the EEG of epilepsy patients." *Physica D: Nonlinear Phenomena* (Physica) 358–369.

V. Navarro, J. Martinerie, M. Le Vanquyen, S. Clemenceau,. 2002. "Seizure Anticipation In Human Neocortical Partial Epilepsy." *Brain* 125: 640–55.

Niederhauser JJ, Esteller R, Echauz J, Vachtsevanos G, Litt B. 2003. "Detection of seizure precursors from depth-EEG using a sign periodogram transform." *IEEE Trans Biomed Eng* 50: 449–58.

W. De Clercq, P. Lemmerling, S. Van Huffel, W. Van Paesschen. 2003. "Anticipation of Epileptic Seizures From Standard EEG Recordings." *Lancet* 357: 183-188.

Iasemidis LD, Shiau DS, Chaovalitwongse W, Sackellares JC, Pardalos PM, Principe JC, et al. 2003. "Adaptive epileptic seizure prediction system." *IEEE Trans Biomed Eng* 50: 616–27.

Winterhalder, M., Maiwald, T., and el. 2003. "The seizure prediction characteristic: a general framework to assess and compare seizure prediction methods." (Epilepsy & Behavior) 318-325.

Maiwald, T. Winterhalder, M. Aschenbrenner-Scheibe, R. and et al. 2004. "Comparison of three nonlinear seizure prediction methods by means of the seizure prediction characteristic." *Physica D: Nonlinear Phenomena* (Physica) 357–368. doi:10.1016/j.physd.2004.02.013.

Esteller R, Echauz J, D'Alessandro M, Worrell G, Cranstoun S, Vachtsevanos G, et al. 2005. "Continuous energy variation during the seizure cycle: towards an on-line accumulated energy." *Clin Neurophysiol* 116: 517–26.

Iasemidis LD, Shiau DS, Pardalos PM, Chaovalitwongse W, Narayanan K, Prasad A, et al. ". 2005. "Long-term prospective on-line real-time seizure prediction." *Clin Neurophysiol* 116: 532–44.

B. Schelter, M. Winterhalder, T. Maiwald, A. Brandt, A. Schad, A. S. Bonhage, J. Timmer. 2006. "Testing statistical significance of multivariate time series analysis techniques for epileptic seizure prediction." *Chaos* 16: 1054-1500.

Schad, A., Schindler, K. and, al. 2008. "Application of a multivariate seizure detection and prediction method to non-invasive and intracranial long-term EEG recordings." *Clinical Neurophysiology* (Clinical Neurophysiology) 119 (1): 197-211.

A. Kamali, A. M. Nasrabai, A. H. Omidvarnia. 2008. "Empirical Mode Decomposition In Epileptic Seizure Prediction." *978-1 -4244-3555-IEEE.*

Mamaghanian H, M. B. Shamsollahi, S. Hajipour. 2008. "Tracking Dynamical Transition of Epileptic EEG Using Particle Filter." *IEEE International Symposium on Signal Processing and Information Technology, ISSPIT 10.1109/ISSPIT..4775727* 270 – 274.

Mamaghanian, Hossein. 2010. "Specified index to describe the EEG signal in order to predict epileptic seizures." Report master's thesis, Iran, Tehran.

Miri, Mahmood Reza. Motie Nasrabadi, A. 2011. "A new seizure prediction method based on return map." Iran, Tehran: 18th Iranian Conference of Biomedical Engineering (ICBME). doi:10.1109/ICBME.2011.6168565.

Niknazar, Hamid. 2013. *Epileptic seizures prediction using EEG signal similarity index.* Report master's thesis, Iran, Tehran: Shahed University.

Bandarabadi, M. Teixeira, C, A., and et al. 2015. "Epileptic seizure prediction using relative spectral power features." *International Federation of Clinical Neurophysiology* (Elsevier Ireland Ltd).[126(2](https://www.sciencedirect.com/science/journal/13882457/126/2)), Pages 237-248

Bedeeuzzaman, M. Fathima, T. and et al. 2014. "Seizure prediction using statistical dispersion measures of intracranial EEG." *Biomedical Signal Processing and Control* 338-341.

Z. Zhang, and K.K. Parhi. 2016. "Low-Complexity Seizure Prediction From iEEG/sEEG Using Spectral Power and Ratios of Spectral Power." IEEE TRANSACTIONS ON BIOMEDICAL CIRCUITS AND SYSTEMS*.* doi:10.1109/TBCAS.2015.2477264. 10(3):693 - 706.
